# Supplementary material for: IGF-1-enhanced miR-513a-5p signaling desensitizes glioma cells to temozolomide by targeting the NEDD4L-inhibited Wnt/β-catenin pathway
Source: PubMed Central journal article supplement (PMC6894868; doi:10.1371/journal.pone.0225913), 2019-12-05

**S2 Fig. Raw data of immunoblotting assays.**

**1C**

**U87-MG**

**IGF-1 (ng/ml)**

**Mock 100 200**

**p-Ser9-GSK3 $\beta$**

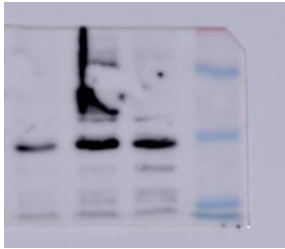

**p- $\beta$ -catenin**

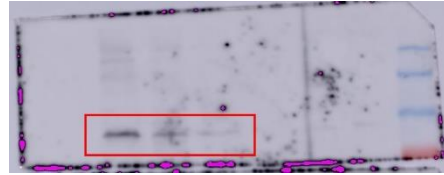

**$\beta$ -catenin**

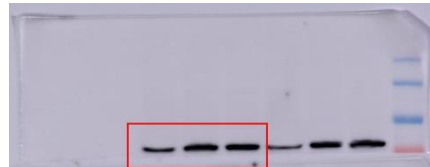

**p-Tyr216-GSK3 $\beta$**

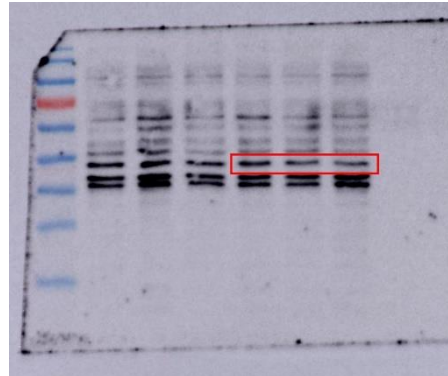

**Cyclin D1**

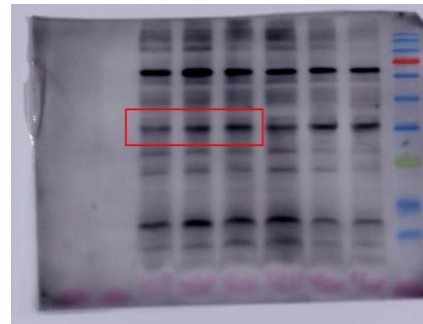

**$\beta$ -actin**

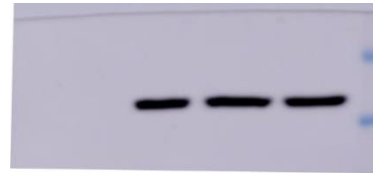

**GSK3 $\beta$**

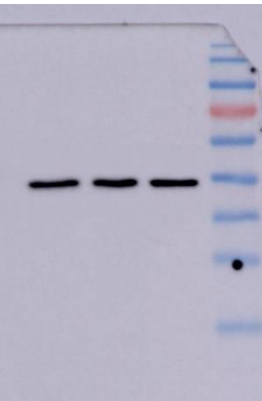

**M059K**

**IGF-1 (ng/ml)**

**Mock 100 200**

**p- $\beta$ -catenin**

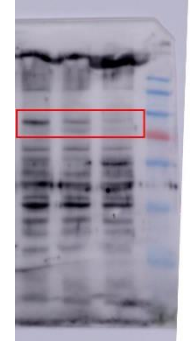

**$\beta$ -catenin**

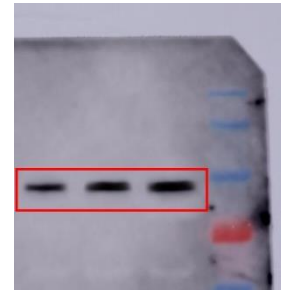

**$\beta$ -actin**

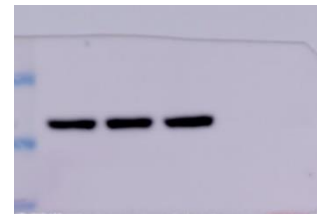

Continued S2 Fig.

1D

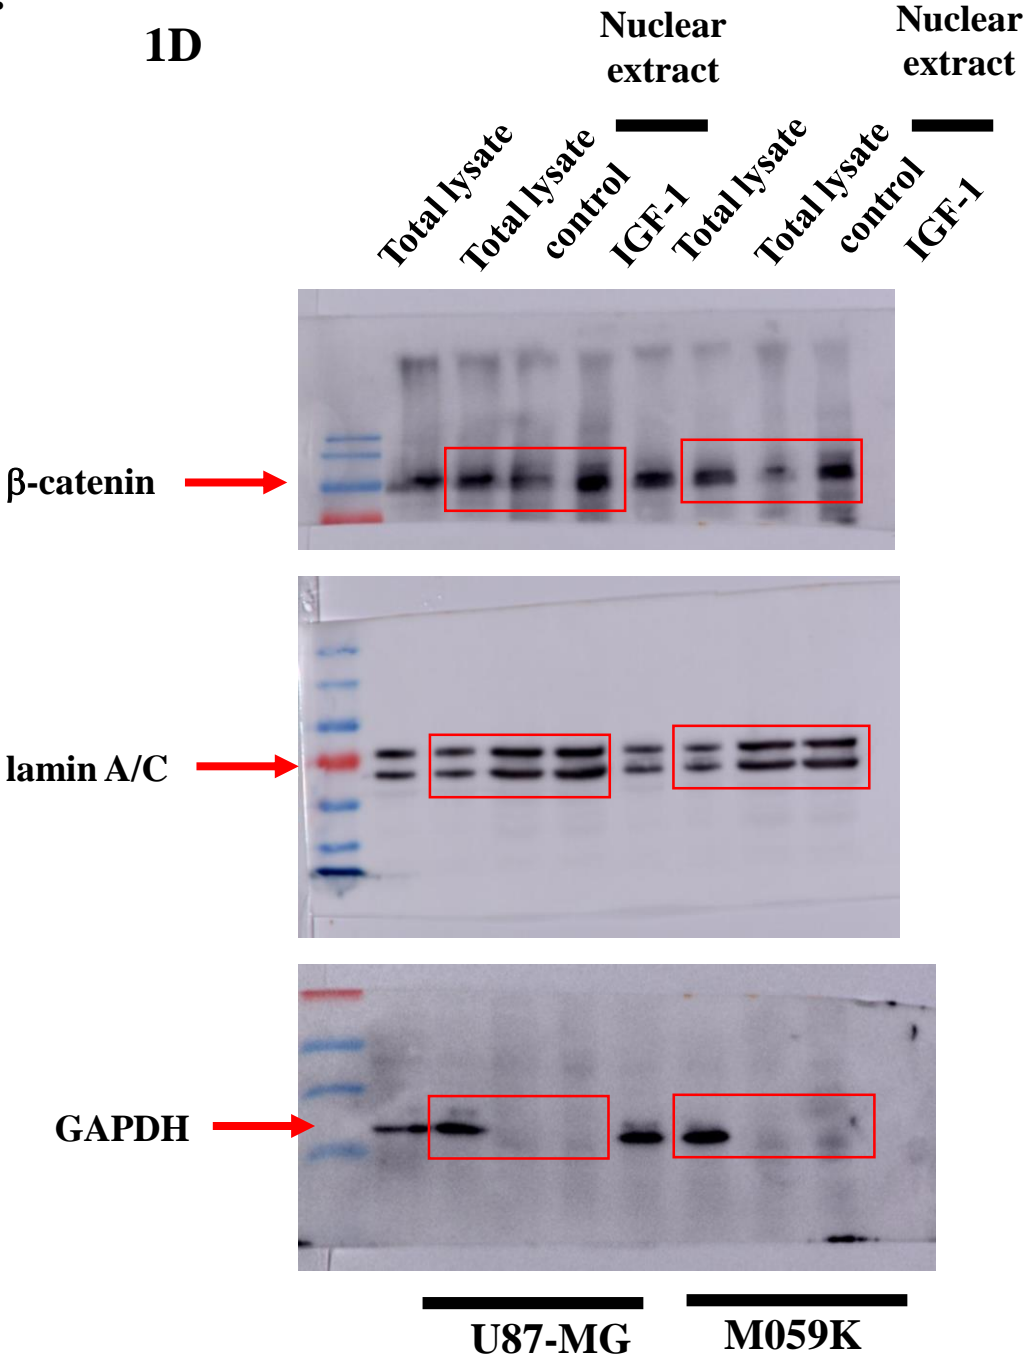

Continued S2 Fig.

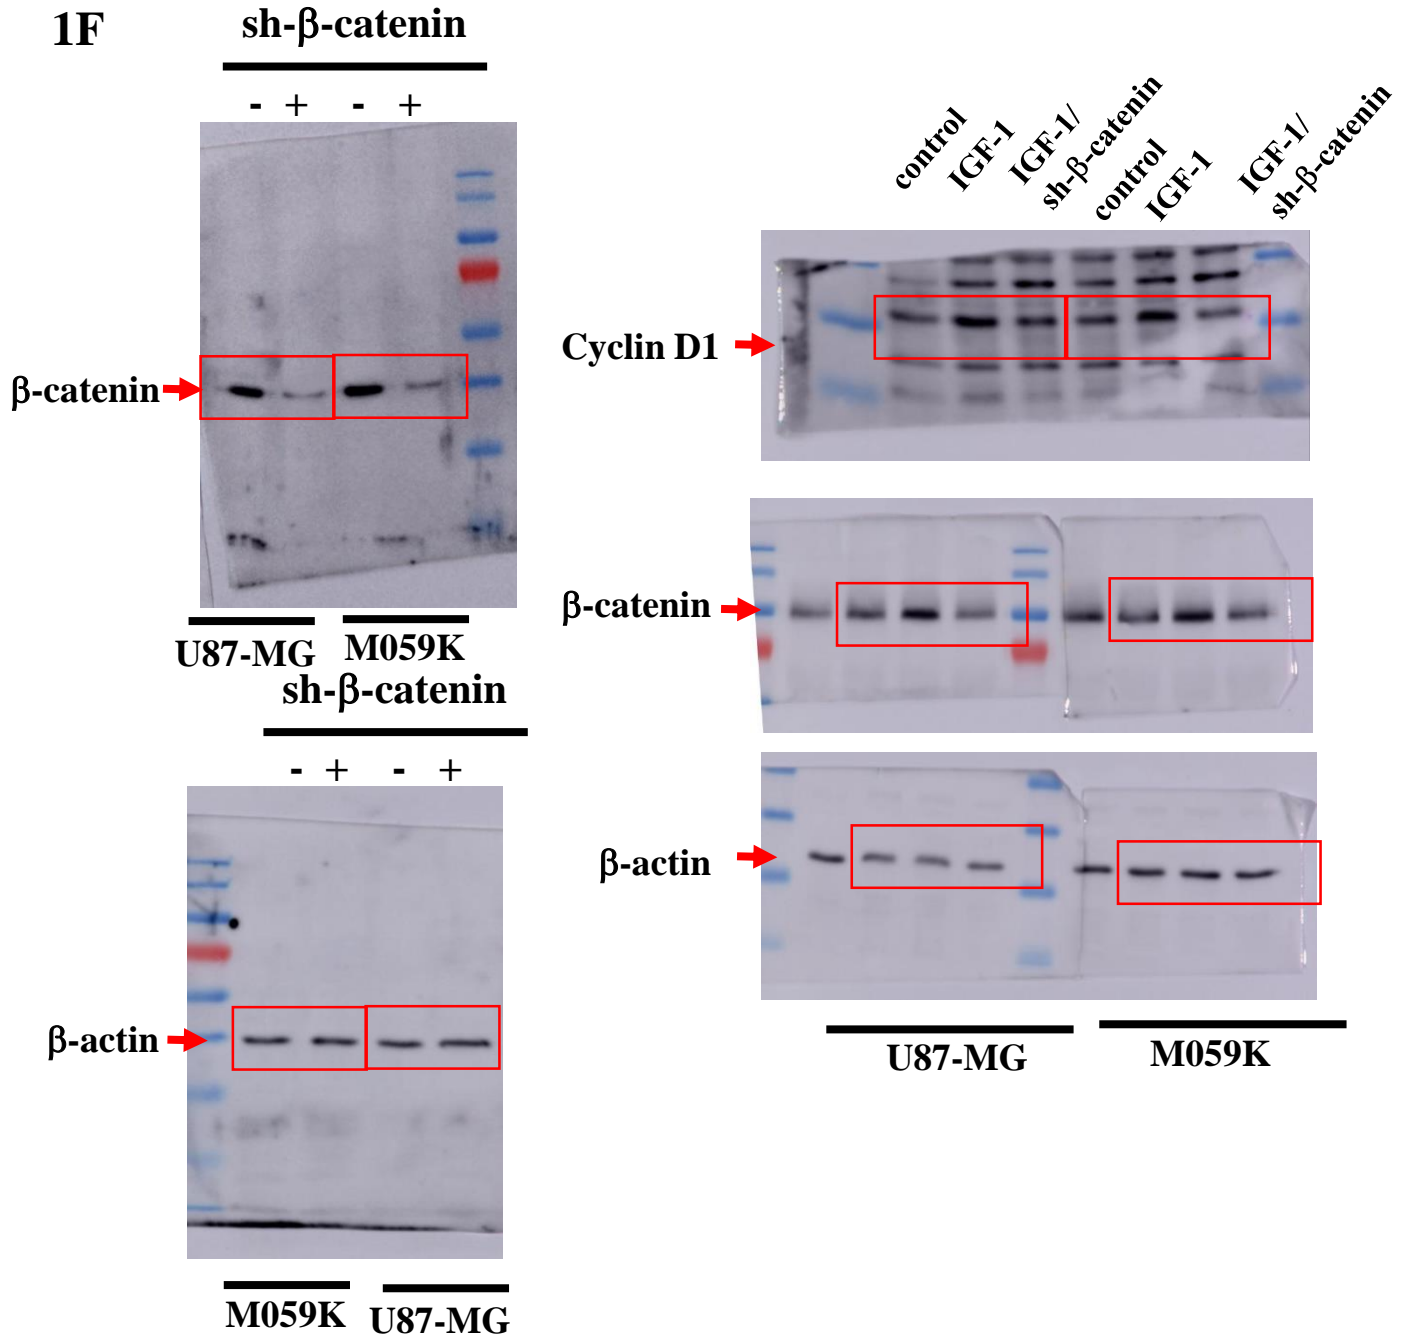

**Continued S2 Fig.**

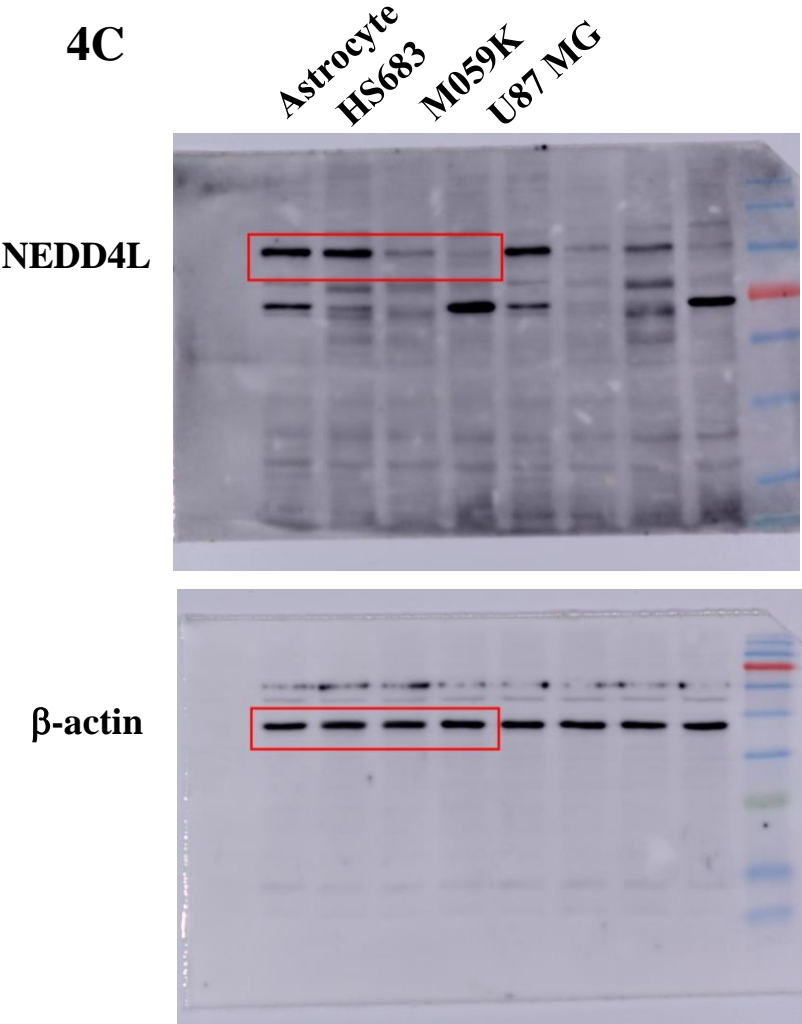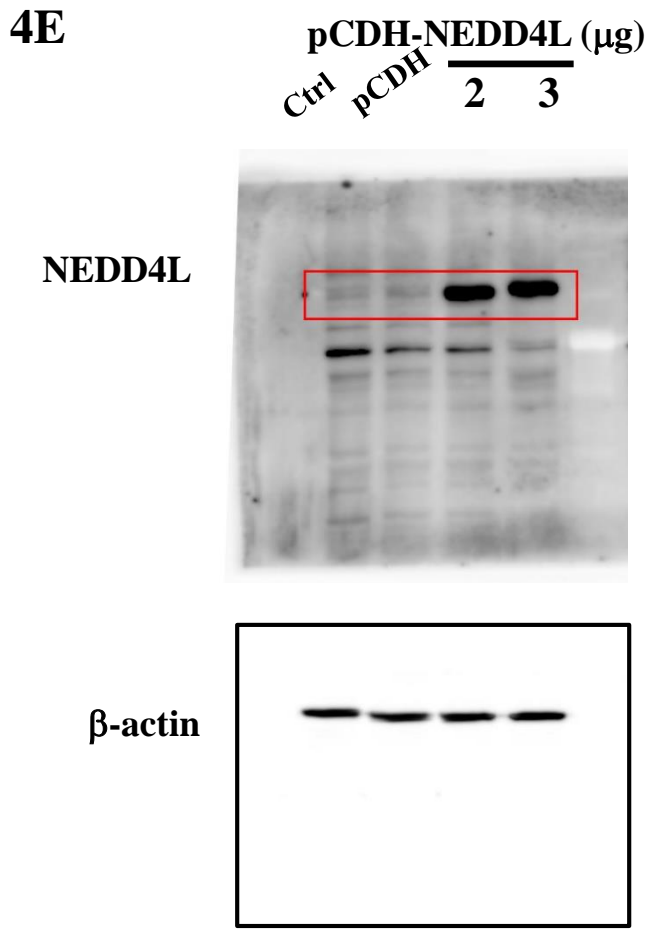

**Continued S2 Fig.**

**5F**

pCDH-miR-513a (μg)  
Ctrl 1 2

**NEDD4L**

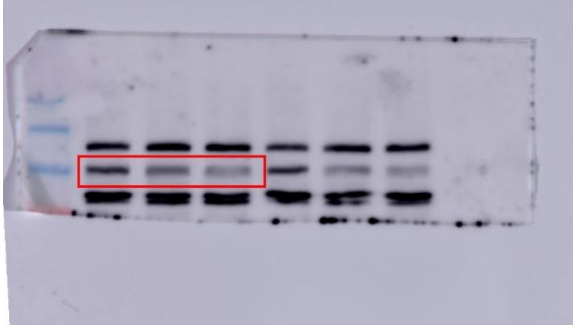

**β-actin**

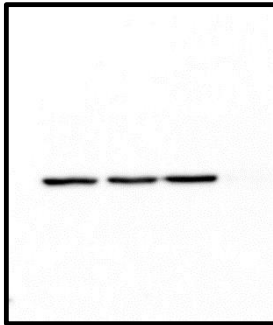

**5G**

U87-MG

IGF-1 (ng/ml) Mock 100 200

**NEDD4L**

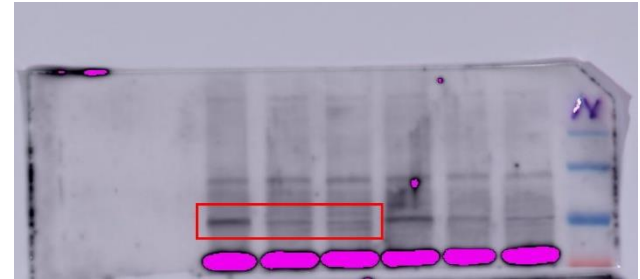

**β-actin**

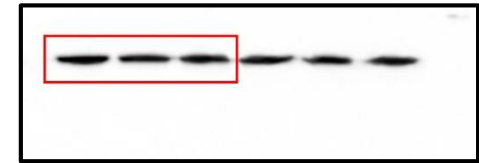

M059K

IGF-1 (ng/ml) Mock 100 200

**NEDD4L**

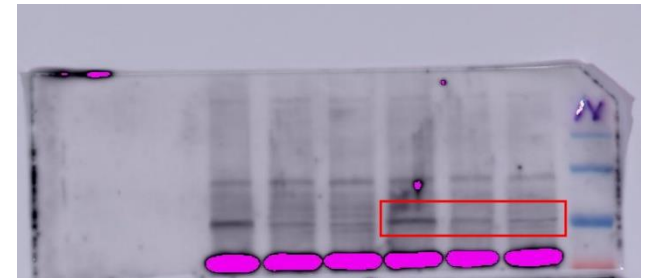

**β-actin**

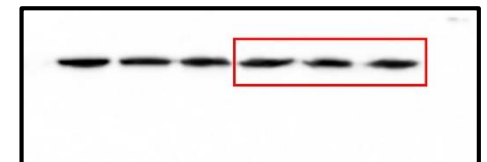

Continued S2 Fig.

5H

|          |   |   |   |   |
|----------|---|---|---|---|
| IGF-1    | - | + | - | + |
| miR-513a | - | - | + | + |

NEDD4L

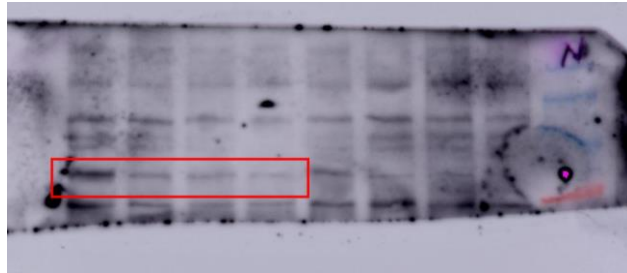

$\beta$ -actin

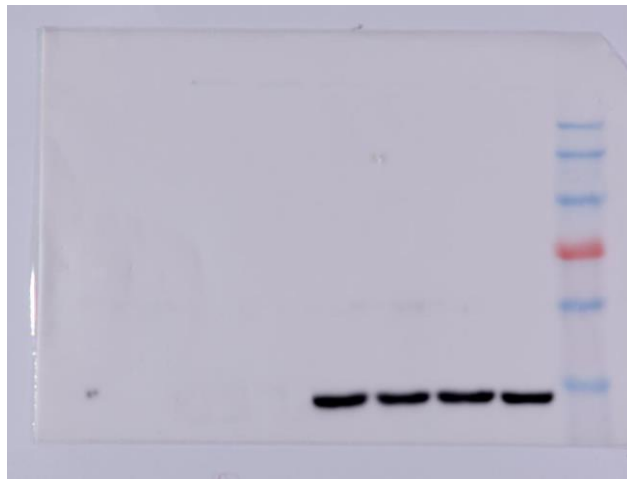

5I

|  |                             |              |                                     |                             |              |                                     |
|--|-----------------------------|--------------|-------------------------------------|-----------------------------|--------------|-------------------------------------|
|  | <b>Nuclear extract</b>      |              |                                     | <b>Nuclear extract</b>      |              |                                     |
|  | <i>Total lysate control</i> | <i>IGF-1</i> | <i>IGF-1/<br/>miR-513 inhibitor</i> | <i>Total lysate control</i> | <i>IGF-1</i> | <i>IGF-1/<br/>miR-513 inhibitor</i> |

$\beta$ -catenin

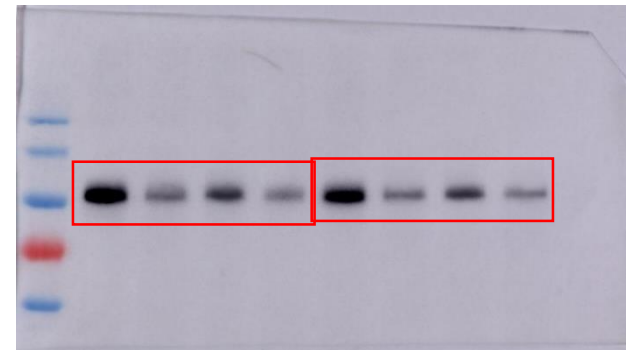

lamin A/C

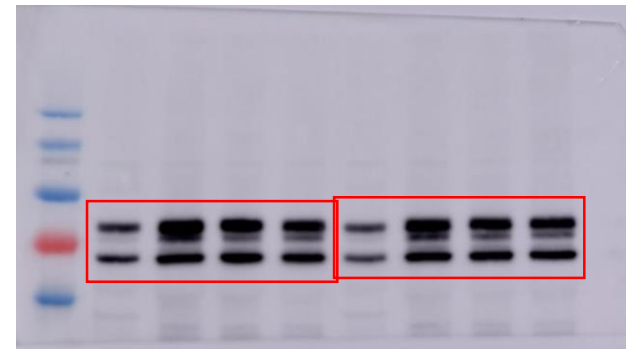

GAPDH

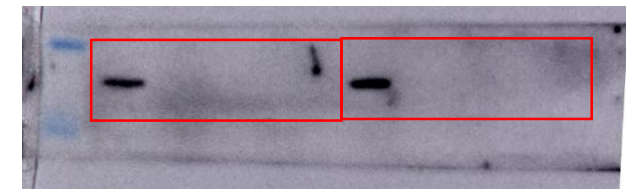

U87-MG

M059K

5J

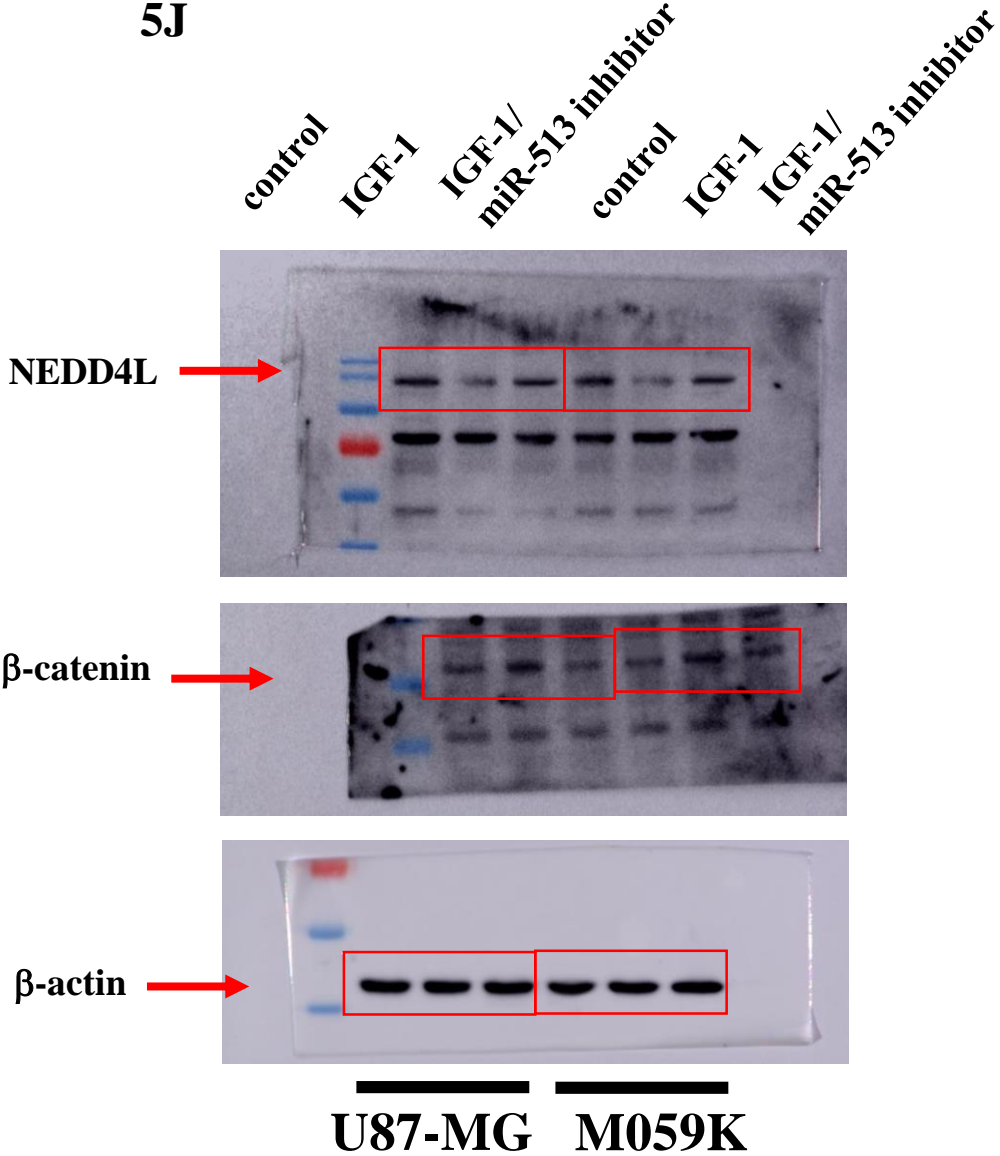

# Continued S2 Fig.

pCDH-miR-513a ( $\mu\text{g}$ )

Ctrl 1 2

6A

NEDD4L

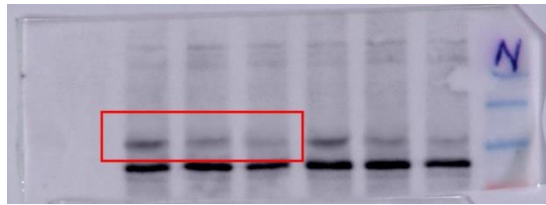

p-Tyr216-GSK3 $\beta$

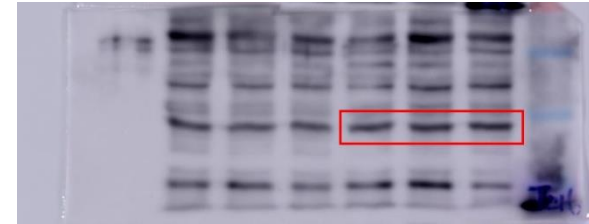

p- $\beta$ -catenin

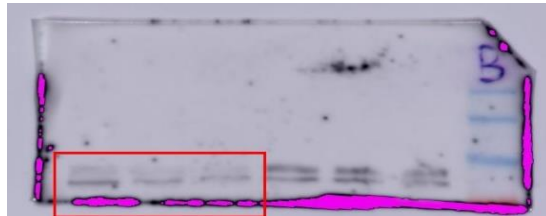

GSK3 $\beta$

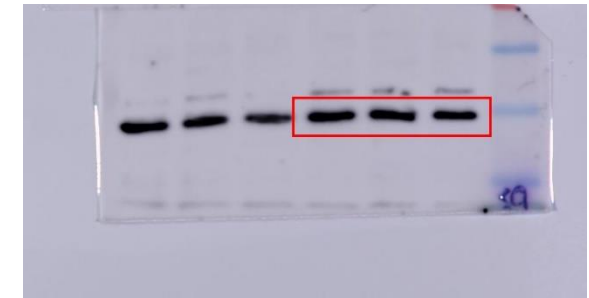

$\beta$ -catenin

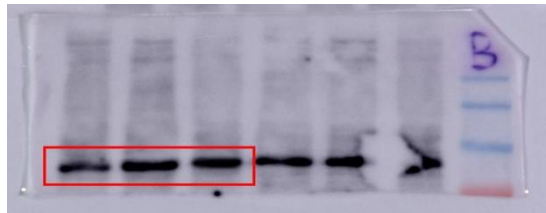

Cyclin D1

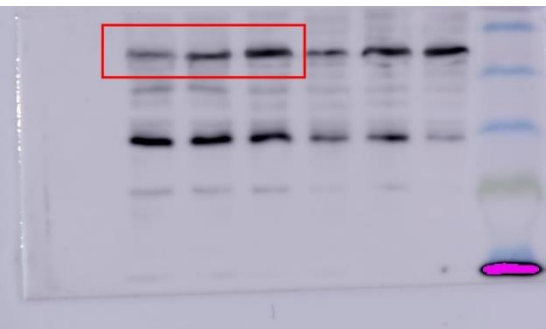

$\beta$ -actin

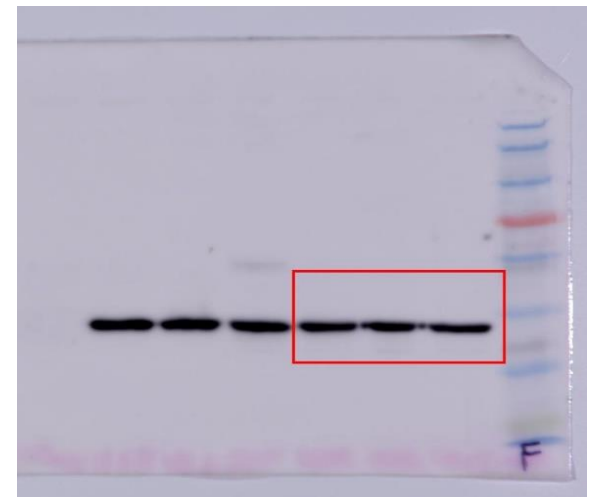

p-Ser9-GSK3 $\beta$

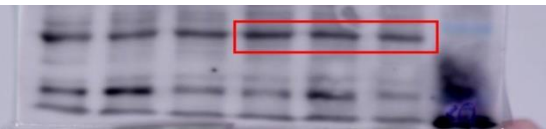



Continued S2 Fig.

**6B**  
IGF-1 - + - +  
miR-513a - - + +

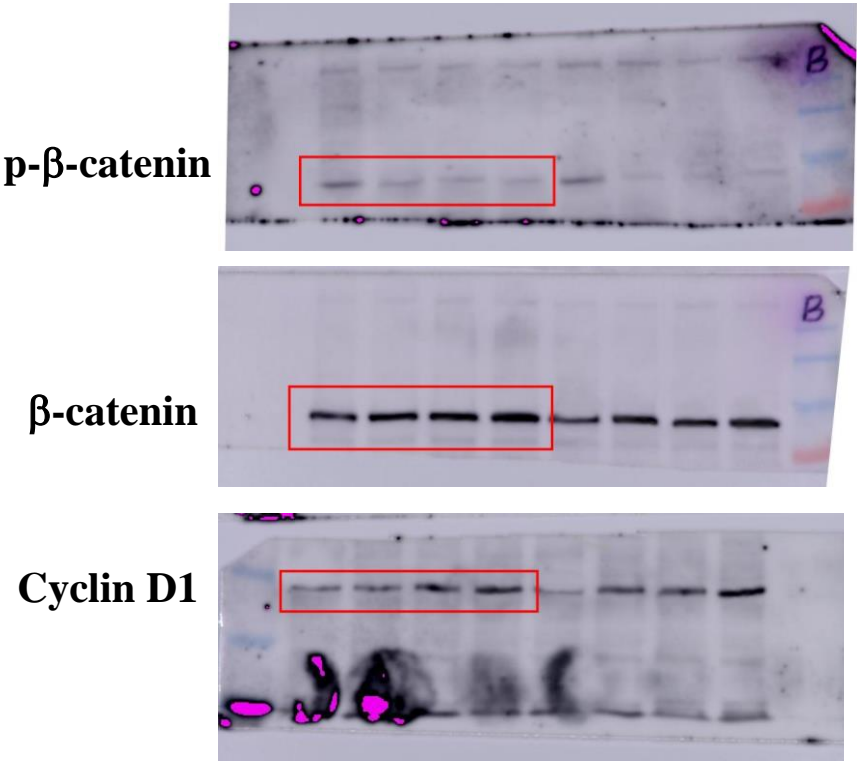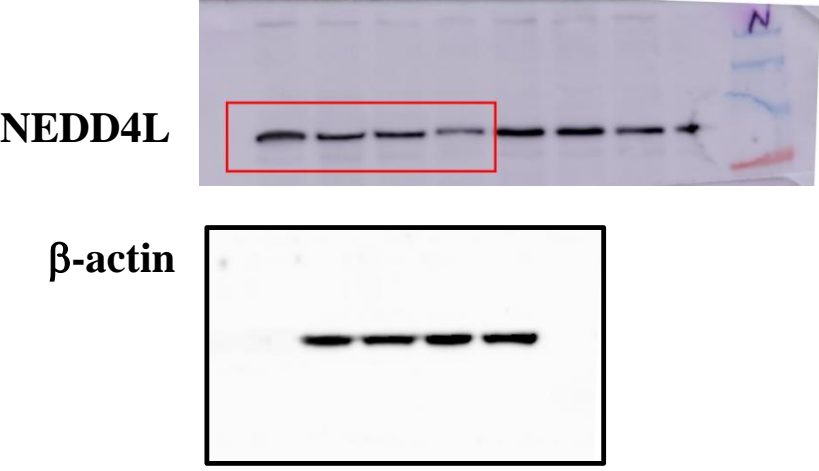

Continued S2 Fig.

|        |   |   |   |   |
|--------|---|---|---|---|
| IGF-1  | - | - | + | + |
| NEDD4L | - | + | - | + |

6C

p- $\beta$ -catenin

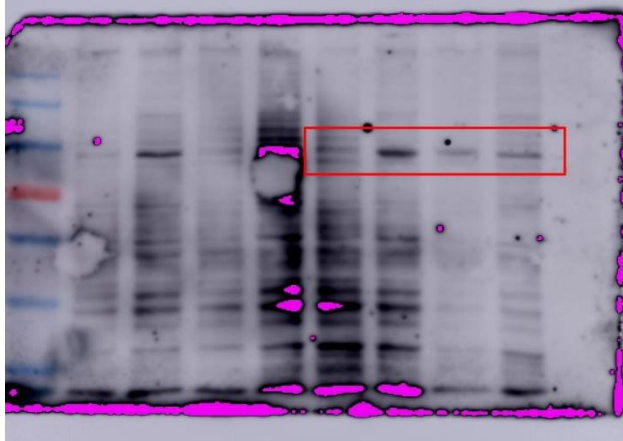

$\beta$ -catenin

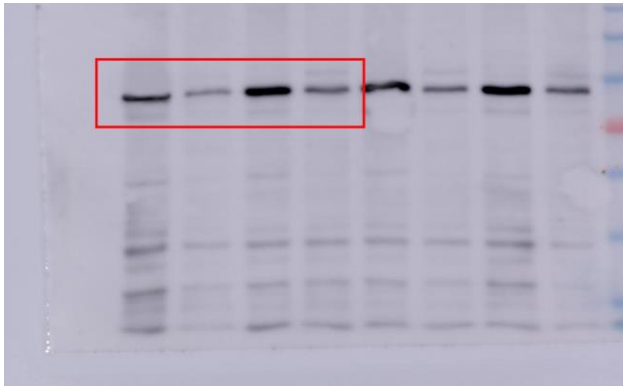

Cyclin D1

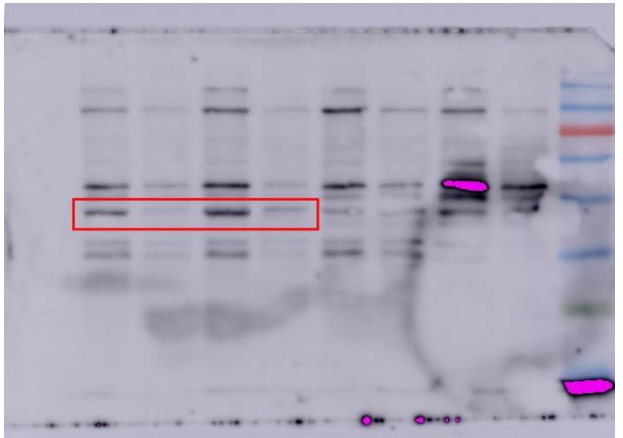

NEDD4L

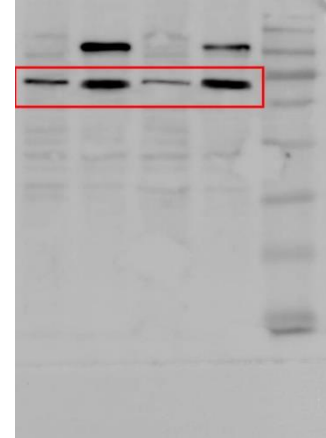

$\beta$ -actin

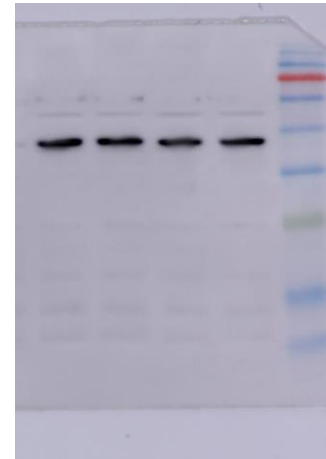

Supplement: pone.0225913.s002.pdf [file pone.0225913.s002.pdf]
