# Supplementary material for: IGF-1-enhanced miR-513a-5p signaling desensitizes glioma cells to temozolomide by targeting the NEDD4L-inhibited Wnt/β-catenin pathway
Source: PubMed Central journal article supplement (PMC6894868; doi:10.1371/journal.pone.0225913), 2019-12-05
Supplement: pone.0225913.s003.pdf [file pone.0225913.s003.pdf]

**S1 Table. Primer list**

| <b>Primer name</b>               | <b>Sequence</b>                            |
|----------------------------------|--------------------------------------------|
| <b>For NEDD4L gene cloning</b>   |                                            |
| NEDD-clon-F                      | ACTTCTAGAATGGAGCGACCCTATACATTTAAGG         |
| NEDD-clon-R                      | ACTGCTAGCTTAATCCACCCCTTCAAATCC             |
| <b>For miR-513a gene cloning</b> |                                            |
| miR-513a-clon-F                  | CATAGAATTCCAAGTTGCATTGTCCCTTGGCATAAATC     |
| miR-513a-clon-R                  | ATGCGGATCCAGGCACAAAAAGTTCCTTGAAGTGTAGC     |
| <b>For NEDD4L 3'UTR cloning</b>  |                                            |
| NEDD-3UTR-F                      | TATCTCGAGTTGCGTGACTTTGTTCTTCCT             |
| NEDD-3UTR-R                      | ATCTCTAGAAAGCGAAAGGATTGTTCTTCA             |
| <b>For 3'UTR Mutagenesis</b>     |                                            |
| NEDD-3UMUT-F                     | TTTTCTCCAAGCTGTGTATCAGTCATTTCAACCCTTGGAGCC |
| NEDD-3UMUT-R                     | GGCTCCAAGGGTTGAAATGACTGATACACAGCTTGGAGAAAA |
| <b>For real-time PCR</b>         |                                            |
| NEDD4L-sybr-F                    | GACATGGAGCATGGATGGGAA                      |
| NEDD4L-sybr-R                    | GTTCGGCCTAAATTGTCCACT                      |
| GAPDH-sybr-F                     | GTG AAG GTC GGA GTC AAC                    |
| GAPDH-sybr-R                     | GTT GAG GTC AAT GAA GGG                    |
