# Supplementary material for: IGF-1-enhanced miR-513a-5p signaling desensitizes glioma cells to temozolomide by targeting the NEDD4L-inhibited Wnt/β-catenin pathway
Source: PubMed Central journal article supplement (PMC6894868; doi:10.1371/journal.pone.0225913), 2019-12-05
Supplement: pone.0225913.s004.pdf [file pone.0225913.s004.pdf]

**S2 Table. List of IGF-1-upregulated miRNAs in U87 MG cells ( $\log_2(\text{Ratio}) \geq 0.58$ ; adj.  $p$  value  $\leq 0.05$ )**

| Name             | Normalized Intensity |          | CV*        |            | $\log_2(\text{Ratio})$ | AveExpr**   | P.Value  | adj. $p$ value*** |
|------------------|----------------------|----------|------------|------------|------------------------|-------------|----------|-------------------|
|                  | Control              | IGF-1    | Control    | IGF-1      |                        |             |          |                   |
| hsa-miR-513a-5p  | 376.145              | 1511.695 | 0.07950005 | 0.11197648 | 2.004552805            | 9.555138345 | 0.000336 | 0.003783          |
| hsa-miR-513b     | 130.5                | 509.375  | 0.08127664 | 0.05229293 | 1.966077907            | 8.008558435 | 0.000128 | 0.003168          |
| hsa-miR-4299     | 139.5                | 442.7    | 0.10644618 | 0.07644484 | 1.668051795            | 7.95404887  | 0.000514 | 0.004352          |
| hsa-miR-4672     | 82                   | 220.89   | 0.05173952 | 0.02669777 | 1.430341331            | 7.071756508 | 8.81E-05 | 0.003044          |
| hsa-miR-3687     | 94.5                 | 225.86   | 0.0673435  | 0.16661747 | 1.248597178            | 7.184903447 | 0.003163 | 0.010677          |
| hsa-miR-4492     | 1381.095             | 3272.415 | 0.04310444 | 0.0265153  | 1.244959979            | 11.05340639 | 9.67E-05 | 0.003044          |
| hsa-miR-1247-3p  | 103                  | 241.51   | 0.01373023 | 0.09697063 | 1.226107064            | 7.299486062 | 0.000572 | 0.004486          |
| hsa-miR-30c-1-3p | 456                  | 1033.865 | 0.00620269 | 0.01963606 | 1.180816881            | 9.423284578 | 2.46E-05 | 0.002683          |
| hsa-miR-4684-3p  | 86                   | 193.01   | 0          | 0.03179984 | 1.165902215            | 7.009215862 | 4.62E-05 | 0.003044          |
| hsa-miR-1275     | 2147.81              | 4812.195 | 0.01436067 | 0.07441219 | 1.161903232            | 11.64952789 | 0.000332 | 0.003783          |
| hsa-miR-4508     | 1106.5               | 2457.22  | 0.01342001 | 0.0910207  | 1.148094235            | 10.68576989 | 0.000587 | 0.004486          |
| hsa-miR-3714     | 110.5                | 244.735  | 0.05759241 | 0.11403969 | 1.143665478            | 7.358537992 | 0.001516 | 0.007438          |
| hsa-miR-4753-5p  | 113.25               | 246.285  | 0.19043494 | 0.10746496 | 1.129840365            | 7.375087379 | 0.007534 | 0.018145          |
| hsa-miR-4539     | 126                  | 273.02   | 0          | 0.04672261 | 1.114795124            | 7.534677485 | 0.000113 | 0.003044          |
| hsa-miR-6129     | 123                  | 264.5    | 0.01149767 | 0.00267337 | 1.10465451             | 7.494794079 | 2.04E-05 | 0.002683          |
| hsa-miR-4283     | 84.5                 | 177.865  | 0.00836813 | 0.09433921 | 1.070567539            | 6.936137949 | 0.000789 | 0.005018          |
| hsa-miR-30b-3p   | 163                  | 338.365  | 0.06940925 | 0.17618895 | 1.044164045            | 7.869070482 | 0.006272 | 0.016003          |
| hsa-miR-3934-5p  | 119.5                | 245      | 0.04142048 | 0.11544601 | 1.03156712             | 7.41603131  | 0.001845 | 0.008136          |
| hsa-miR-513c-5p  | 77.5                 | 158.525  | 0.00912396 | 0.07230532 | 1.030584094            | 6.791386427 | 0.000433 | 0.004097          |

|                                  |         |         |            |            |             |             |          |          |
|----------------------------------|---------|---------|------------|------------|-------------|-------------|----------|----------|
| hsa-miR-1321                     | 119.5   | 239.075 | 0.02958606 | 0.01611934 | 1.000674716 | 7.400888386 | 8.20E-05 | 0.003044 |
| hsa-miR-3945                     | 256.5   | 510.9   | 0.02481076 | 0.04124444 | 0.993690361 | 8.499438141 | 0.000173 | 0.003423 |
| hsa-miR-4417                     | 93      | 183.77  | 0.03041319 | 0.05209896 | 0.981952693 | 7.029801471 | 0.000308 | 0.003783 |
| hsa-miR-3667-5p                  | 86.5    | 168.84  | 0.02452393 | 0.14373315 | 0.957611658 | 6.913217106 | 0.003808 | 0.012187 |
| hsa-miR-652-5p                   | 157.5   | 299.545 | 0.02244783 | 0.03750998 | 0.927095046 | 7.762573773 | 0.000173 | 0.003423 |
| hsa-miR-575                      | 99      | 187.825 | 0.01428499 | 0.08150599 | 0.92156225  | 7.090064142 | 0.000859 | 0.005253 |
| hsa-miR-1273c                    | 97      | 183.765 | 0.02915904 | 0.0520619  | 0.921133844 | 7.060173036 | 0.000365 | 0.003783 |
| hsa-miR-1236-5p                  | 331     | 623.505 | 0.02136274 | 0.02042485 | 0.913584051 | 8.827314814 | 8.73E-05 | 0.003044 |
| hsa-miR-4531                     | 80.5    | 151.56  | 0.04391968 | 0.06065181 | 0.912196398 | 6.786319024 | 0.000676 | 0.004826 |
| hsa-miR-3132                     | 139     | 260.955 | 0.08139359 | 0.02192138 | 0.91093622  | 7.572015783 | 0.000936 | 0.005292 |
| hsa-miR-4430                     | 259.105 | 482.99  | 0.10973452 | 0.0438913  | 0.90211755  | 8.46409558  | 0.002487 | 0.009713 |
| hsa-miR-4294                     | 626     | 1170.91 | 0.03388691 | 0.10738462 | 0.899638786 | 9.739423951 | 0.002186 | 0.008889 |
| hsa-miR-3126-5p                  | 186     | 346.72  | 0          | 0.08292271 | 0.895984108 | 7.987150865 | 0.000942 | 0.005292 |
| hsa-miR-4669                     | 216.285 | 401.66  | 0.07378875 | 0.01683001 | 0.894905481 | 8.202276077 | 0.000738 | 0.004936 |
| hsa-miR-491-5p                   | 88      | 162.645 | 0.04821183 | 0.08821173 | 0.884177886 | 6.900681731 | 0.00167  | 0.00776  |
| hsa-miR-3180,<br>hsa-miR-3180-3p | 207.6   | 377.92  | 0.04359811 | 0.01900986 | 0.864829969 | 8.129391725 | 0.000259 | 0.003666 |
| hsa-miR-4481                     | 161.5   | 290.83  | 0.02189185 | 0.02032601 | 0.848665779 | 7.759550369 | 0.000112 | 0.003044 |
| hsa-miR-5001-5p                  | 86      | 154.205 | 0.01644434 | 0.05314593 | 0.841519079 | 6.846926755 | 0.000406 | 0.004034 |
| hsa-miR-4257                     | 180.5   | 322.345 | 0.10577221 | 0.01603546 | 0.84056048  | 7.912088807 | 0.002322 | 0.009236 |
| hsa-miR-1292-5p                  | 116     | 208.275 | 0.03657449 | 0.12524388 | 0.839167663 | 7.277082194 | 0.0041   | 0.012723 |
| hsa-miR-30c-2-3p                 | 91      | 162.87  | 0.03108162 | 0.12356026 | 0.834603378 | 6.92474781  | 0.003895 | 0.01238  |
| hsa-miR-5703                     | 98.5    | 176.26  | 0.02153625 | 0.15950622 | 0.830441572 | 7.037105302 | 0.007708 | 0.018443 |

|                 |         |          |            |            |             |             |          |          |
|-----------------|---------|----------|------------|------------|-------------|-------------|----------|----------|
| hsa-miR-371b-5p | 105     | 185.775  | 0.0673435  | 0.08149189 | 0.822405413 | 7.123810658 | 0.002393 | 0.009432 |
| hsa-miR-4635    | 87      | 153.56   | 0.01625533 | 0.04706064 | 0.81901124  | 6.852353807 | 0.000339 | 0.003783 |
| hsa-miR-3918    | 313.4   | 553.695  | 0.08754226 | 0.147361   | 0.815980744 | 8.697082356 | 0.009652 | 0.021836 |
| hsa-miR-4532    | 284     | 500.345  | 0.06473513 | 0.09142239 | 0.815524473 | 8.555996317 | 0.00289  | 0.01016  |
| hsa-miR-4665-5p | 150     | 262.5    | 0          | 0.0134687  | 0.807289491 | 7.632463436 | 5.76E-05 | 0.003044 |
| hsa-miR-4436a   | 89.5    | 154.5    | 0.00790063 | 0.05034417 | 0.786755044 | 6.877170786 | 0.000405 | 0.004034 |
| hsa-miR-4251    | 85      | 145.83   | 0.03327561 | 0.01706793 | 0.779047189 | 6.798515058 | 0.000216 | 0.003616 |
| hsa-miR-675-5p  | 128.5   | 220.325  | 0.01650833 | 0.03398734 | 0.777546396 | 7.394299448 | 0.000222 | 0.003621 |
| hsa-miR-3138    | 302.04  | 515.91   | 0.06105597 | 0.05457733 | 0.77265044  | 8.623575246 | 0.001428 | 0.007147 |
| hsa-miR-4468    | 85      | 144.84   | 0.03327561 | 0.02421465 | 0.769113296 | 6.793548112 | 0.000272 | 0.003666 |
| hsa-miR-4722-5p | 107.5   | 182.785  | 0.04604416 | 0.04475874 | 0.765853164 | 7.130354374 | 0.000774 | 0.005018 |
| hsa-miR-583     | 96      | 163.5    | 0.02946278 | 0.10422797 | 0.764568629 | 6.966933662 | 0.003196 | 0.010707 |
| hsa-miR-4726-5p | 91      | 153.87   | 0.01554081 | 0.04521954 | 0.757122755 | 6.886268904 | 0.000394 | 0.004034 |
| hsa-miR-4475    | 85.5    | 143.88   | 0.00827025 | 0.01847874 | 0.750771241 | 6.793213466 | 9.85E-05 | 0.003044 |
| hsa-miR-4725-3p | 685.57  | 1153.655 | 0.01561561 | 0.10805297 | 0.746700555 | 9.794422492 | 0.00351  | 0.011521 |
| hsa-miR-4478    | 85      | 142.265  | 0          | 0.00263429 | 0.743043525 | 6.780912699 | 5.58E-05 | 0.003044 |
| hsa-miR-4525    | 309.765 | 512.39   | 0.13803608 | 0.04523695 | 0.73223493  | 8.634242591 | 0.008304 | 0.019708 |
| hsa-miR-4538    | 88      | 145.855  | 0.01607061 | 0.01110195 | 0.729008114 | 6.823842521 | 0.000104 | 0.003044 |
| hsa-miR-1254    | 110.5   | 182.685  | 0.04479409 | 0.04400911 | 0.725336979 | 7.14984699  | 0.000863 | 0.005253 |
| hsa-miR-1273e   | 117.25  | 192.97   | 0.05126147 | 0.02909482 | 0.719431656 | 7.232211561 | 0.000756 | 0.004951 |
| hsa-miR-920     | 104.5   | 171.745  | 0.02029972 | 0.17428065 | 0.705874747 | 7.060147864 | 0.015656 | 0.030851 |
| hsa-miR-4694-3p | 79.5    | 129.4    | 0.06226097 | 0.01530061 | 0.704125893 | 6.663546419 | 0.000997 | 0.005532 |
| hsa-miR-3944-5p | 101.5   | 165.085  | 0.02089971 | 0.07782736 | 0.69969892  | 7.015027818 | 0.00185  | 0.008136 |

|                  |          |           |            |            |             |             |          |          |
|------------------|----------|-----------|------------|------------|-------------|-------------|----------|----------|
| hsa-miR-198      | 134.835  | 218.51    | 0.06120025 | 0.03889718 | 0.697310528 | 7.422354329 | 0.001411 | 0.007147 |
| hsa-miR-5787     | 6581.41  | 10626.475 | 0.02608858 | 0.10443832 | 0.687495258 | 13.02768309 | 0.004316 | 0.012963 |
| hsa-miR-615-5p   | 162.335  | 261.2     | 0.04064007 | 0.02057432 | 0.686624064 | 7.685546365 | 0.000478 | 0.004262 |
| hsa-miR-3158-5p  | 105.5    | 168.875   | 0.0201073  | 0.14341026 | 0.671402406 | 7.056654555 | 0.010594 | 0.023361 |
| hsa-miR-627      | 97.5     | 154.775   | 0.02175713 | 0.04774199 | 0.666046537 | 6.940182829 | 0.000724 | 0.004936 |
| hsa-miR-921      | 173.4    | 274.875   | 0.02772968 | 0.05595115 | 0.663819203 | 7.769592302 | 0.001116 | 0.005929 |
| hsa-miR-4465     | 159.5    | 251.16    | 0.08423216 | 0.07792927 | 0.65542015  | 7.642559138 | 0.005926 | 0.015637 |
| hsa-miR-215      | 90.5     | 141.82    | 0.03906667 | 0.00179494 | 0.648620814 | 6.823605622 | 0.000414 | 0.004035 |
| hsa-miR-3925-5p  | 87.5     | 137.03    | 0.02424366 | 0.03065179 | 0.64700993  | 6.774504058 | 0.000417 | 0.004035 |
| hsa-miR-3122     | 92.5     | 144.79    | 0.0076444  | 0.01465101 | 0.646380348 | 6.854550558 | 0.000131 | 0.003168 |
| hsa-miR-4731-5p  | 92       | 143.415   | 0.07685943 | 0.00054235 | 0.64262384  | 6.842740089 | 0.00211  | 0.00875  |
| hsa-miR-4654     | 101.5    | 158.21    | 0.04876598 | 0.06185676 | 0.639837947 | 6.984396655 | 0.002278 | 0.009188 |
| hsa-miR-3150b-5p | 109.5    | 170.535   | 0.04520317 | 0.0261638  | 0.639627405 | 7.093863411 | 0.00081  | 0.005091 |
| hsa-miR-4708-3p  | 103      | 159.705   | 0.01373023 | 0.10081601 | 0.629157954 | 7.001011507 | 0.004807 | 0.013819 |
| hsa-miR-711      | 196      | 302.135   | 0.04329225 | 0.00989975 | 0.624980614 | 7.926523853 | 0.000604 | 0.004538 |
| hsa-miR-1224-5p  | 249.65   | 382.845   | 0.0829891  | 0.03721663 | 0.618842091 | 8.270695826 | 0.003712 | 0.011986 |
| hsa-miR-4749-5p  | 2259.535 | 3440.08   | 0.13427467 | 0.01010893 | 0.612911676 | 11.4417337  | 0.011254 | 0.024489 |
| hsa-miR-3622a-5p | 92.5     | 141.465   | 0.0076444  | 0.01464548 | 0.6128636   | 6.837792183 | 0.000154 | 0.003278 |
| hsa-miR-5196-5p  | 625.045  | 957.43    | 0.00915213 | 0.12397245 | 0.609672499 | 9.592622288 | 0.009166 | 0.02101  |
| hsa-miR-6718-5p  | 90       | 136.785   | 0.03142697 | 0.01845503 | 0.604146582 | 6.793570078 | 0.00045  | 0.004181 |
| hsa-miR-194-3p   | 91       | 138.335   | 0          | 0.01702147 | 0.604123261 | 6.809856271 | 0.000165 | 0.003423 |
| hsa-miR-1273f    | 108      | 164.085   | 0.09166199 | 0.08692046 | 0.603718672 | 7.053710103 | 0.009821 | 0.022048 |
| hsa-miR-5090     | 108.5    | 165.105   | 0.03258557 | 0.11901819 | 0.600944599 | 7.06164046  | 0.009357 | 0.021335 |

|                 |        |         |            |            |             |             |          |          |
|-----------------|--------|---------|------------|------------|-------------|-------------|----------|----------|
| hsa-miR-5189    | 95     | 143.12  | 0.02977292 | 0.00582997 | 0.591533397 | 6.865302525 | 0.000349 | 0.003783 |
| hsa-miR-4727-3p | 107    | 161.465 | 0          | 0.08964466 | 0.590706403 | 7.036820188 | 0.004105 | 0.012723 |
| hsa-miR-4773    | 79.5   | 119.75  | 0.04447212 | 0.09743016 | 0.588280677 | 6.606309611 | 0.006739 | 0.016771 |
| hsa-miR-214-3p  | 107    | 160.035 | 0.15860339 | 0.08143205 | 0.587511298 | 7.026092335 | 0.026977 | 0.045714 |
| hsa-miR-4516    | 2756   | 4136.75 | 0.07902354 | 0.11751639 | 0.583179497 | 11.71769409 | 0.014827 | 0.029688 |
| hsa-miR-6724-5p | 163.25 | 245     | 0.03248576 | 0.11544601 | 0.581256417 | 7.641186662 | 0.009526 | 0.021664 |

\*CV: coefficient of variance, \*\*AveExpr: Average expression level, \*\*\* adj. *p* value: adjust *p*-values
