# Supplementary material for: IGF-1-enhanced miR-513a-5p signaling desensitizes glioma cells to temozolomide by targeting the NEDD4L-inhibited Wnt/β-catenin pathway
Source: PubMed Central journal article supplement (PMC6894868; doi:10.1371/journal.pone.0225913), 2019-12-05
Supplement: pone.0225913.s005.pdf [file pone.0225913.s005.pdf]

**S3 Table. List of IGF-1-downregulated miRNAs in U87 MG cells ( $\log_2(\text{Ratio}) \leq -0.58$ ;  $\text{adj. } p \text{ value} \leq 0.05$ )**

| Name            | Normalized Intensity |          | CV*        |            | $\log_2(\text{Ratio})$ | AveExpr**   | P.Value  | adj. <i>p</i> value*** |
|-----------------|----------------------|----------|------------|------------|------------------------|-------------|----------|------------------------|
|                 | Control              | IGF-1    | Control    | IGF-1      |                        |             |          |                        |
| hsa-miR-4286    | 14391.82             | 1030.345 | 0.01849153 | 0.39787174 | -3.86340803            | 11.88113407 | 0.001198 | 0.006247               |
| hsa-miR-21-5p   | 6284.595             | 455.77   | 0.2485227  | 0.19337339 | -3.776428643           | 10.70676203 | 0.000594 | 0.004502               |
| hsa-miR-4324    | 2446.485             | 228.465  | 0.06157199 | 0.22250194 | -3.437377346           | 9.536437397 | 0.000308 | 0.003783               |
| hsa-miR-125b-5p | 2685.735             | 250.92   | 0.00459954 | 0.07935648 | -3.422284867           | 9.679951183 | 1.33E-05 | 0.002683               |
| hsa-miR-1260a   | 9965.53              | 971.855  | 0.04079502 | 0.38325522 | -3.412556675           | 11.57585199 | 0.001571 | 0.007519               |
| hsa-let-7f-5p   | 3834.295             | 376.655  | 0.22952278 | 0.31878988 | -3.366008733           | 10.20248599 | 0.00168  | 0.00776                |
| hsa-miR-29a-3p  | 3618.5               | 365.47   | 0.1131449  | 0.06783365 | -3.304596296           | 10.16424581 | 6.36E-05 | 0.003044               |
| hsa-miR-4284    | 52844.005            | 5614.185 | 0.00505789 | 0.26454167 | -3.260275033           | 14.05930545 | 0.000555 | 0.004486               |
| hsa-let-7a-5p   | 4923.9               | 515.325  | 0.28350905 | 0.12987466 | -3.232767769           | 10.61961322 | 0.000937 | 0.005292               |
| hsa-let-7b-5p   | 2312.5               | 264.5    | 0.08469993 | 0.00267337 | -3.125524163           | 9.609883416 | 2.11E-05 | 0.002683               |
| hsa-miR-125a-5p | 1685.385             | 189.75   | 0.27825953 | 0.05403451 | -3.123478916           | 9.128641695 | 0.000782 | 0.005018               |
| hsa-let-7c      | 2943.875             | 360.66   | 0.15654769 | 0.18692275 | -3.032824745           | 9.998194628 | 0.00053  | 0.004438               |
| hsa-miR-16-5p   | 1797.475             | 225.5    | 0.31115098 | 0.24772255 | -2.981460238           | 9.285233799 | 0.002515 | 0.009736               |
| hsa-miR-100-5p  | 1946.735             | 245.38   | 0.229752   | 0.11307715 | -2.973299209           | 9.420896921 | 0.000658 | 0.004777               |
| hsa-let-7d-5p   | 2296                 | 319.805  | 0          | 0.16063322 | -2.853225274           | 9.73829429  | 0.000181 | 0.003432               |
| hsa-miR-363-5p  | 6831.135             | 956.84   | 0.58777103 | 0.32805782 | -2.738884166           | 11.23167615 | 0.016716 | 0.031929               |
| hsa-miR-99a-5p  | 1342.625             | 198.495  | 0.30691107 | 0.01072264 | -2.72312379            | 8.994479282 | 0.001529 | 0.007441               |
| hsa-miR-4443    | 12975.395            | 2131.83  | 0.23459372 | 0.31907255 | -2.623173313           | 12.33177657 | 0.003651 | 0.011867               |
| hsa-miR-221-3p  | 1581.095             | 259.04   | 0.20027227 | 0.03253827 | -2.595445936           | 9.314372088 | 0.000493 | 0.004303               |

|                 |           |          |            |            |              |             |          |          |
|-----------------|-----------|----------|------------|------------|--------------|-------------|----------|----------|
| hsa-miR-1260b   | 24729.045 | 4204.69  | 0.01475202 | 0.28723265 | -2.586444374 | 13.30061822 | 0.001459 | 0.007262 |
| hsa-miR-27a-3p  | 1199.42   | 218.505  | 0.15160626 | 0.29982583 | -2.481435069 | 8.979065791 | 0.002629 | 0.009961 |
| hsa-let-7e-5p   | 1462.4    | 262.5    | 0.04796567 | 0.0134687  | -2.477183797 | 9.27470008  | 1.10E-05 | 0.002683 |
| hsa-miR-23a-3p  | 1152.975  | 231.705  | 0.11778214 | 0.19821146 | -2.324290321 | 9.003979428 | 0.001013 | 0.005582 |
| hsa-miR-222-3p  | 1196.63   | 242.365  | 0.20725758 | 0.21703494 | -2.305254565 | 9.056472346 | 0.002305 | 0.009209 |
| hsa-miR-4454    | 51765.09  | 11439.37 | 0.01161339 | 0.42026709 | -2.244617359 | 14.53733454 | 0.00724  | 0.017714 |
| hsa-miR-3135b   | 2641.385  | 563.075  | 0.1474428  | 0.1684649  | -2.232321242 | 10.24303451 | 0.001045 | 0.005687 |
| hsa-miR-23b-3p  | 973.92    | 207.7    | 0.10152971 | 0.07013192 | -2.227350668 | 8.810256586 | 0.000177 | 0.003423 |
| hsa-miR-29c-3p  | 1037.47   | 225.585  | 0.3128808  | 0.15682139 | -2.174050265 | 8.895627446 | 0.004426 | 0.013155 |
| hsa-miR-29b-3p  | 700.13    | 156.485  | 0.13507272 | 0.02245788 | -2.155169824 | 8.367283544 | 0.000267 | 0.003666 |
| hsa-miR-26a-5p  | 632.9     | 148.625  | 0.11641733 | 0.06170681 | -2.086770568 | 8.257543626 | 0.000263 | 0.003666 |
| hsa-miR-9-5p    | 408.31    | 96.73    | 0.07512501 | 0.04415305 | -2.076294635 | 7.633335338 | 8.10E-05 | 0.003044 |
| hsa-miR-4448    | 5942.25   | 1422.165 | 0.00053548 | 0.11817058 | -2.06797456  | 11.5028062  | 0.000197 | 0.003461 |
| hsa-miR-98-5p   | 800.125   | 192.535  | 0.04219884 | 0.03184157 | -2.054827895 | 8.616025093 | 2.27E-05 | 0.002683 |
| hsa-miR-92b-3p  | 409.59    | 101.375  | 0.0186794  | 0.09590844 | -2.017678006 | 7.669071822 | 0.000122 | 0.003134 |
| hsa-miR-27b-3p  | 621       | 159.2    | 0.09792461 | 0.0284264  | -1.960577536 | 8.294693789 | 0.000151 | 0.003278 |
| hsa-miR-181a-5p | 559.11    | 143.785  | 0.2602501  | 0.05129272 | -1.935316814 | 8.134478238 | 0.00273  | 0.010076 |
| hsa-miR-22-3p   | 906.325   | 240.715  | 0.14928958 | 0.24672288 | -1.926914886 | 8.85234363  | 0.003518 | 0.011521 |
| hsa-miR-5100    | 10796     | 2873.995 | 0.06864097 | 0.22502224 | -1.926163956 | 12.43342593 | 0.001919 | 0.008273 |
| hsa-let-7g-5p   | 698.175   | 189.175  | 0.21304102 | 0.0008597  | -1.86730921  | 8.497231973 | 0.001567 | 0.007519 |
| hsa-miR-92a-3p  | 508.61    | 139.165  | 0.14567281 | 0.04232529 | -1.862715225 | 8.05136381  | 0.000567 | 0.004486 |
| hsa-miR-10a-5p  | 416.41    | 119.73   | 0.13785195 | 0.09295799 | -1.794456723 | 7.797745833 | 0.000833 | 0.005181 |
| hsa-miR-19b-3p  | 574       | 164.28   | 0.25377003 | 0.04726097 | -1.782090645 | 8.250252314 | 0.003221 | 0.010709 |

|                 |          |         |            |            |              |             |          |          |
|-----------------|----------|---------|------------|------------|--------------|-------------|----------|----------|
| hsa-miR-15a-5p  | 348.63   | 102.415 | 0.03095101 | 0.00807806 | -1.766947629 | 7.5617335   | 1.29E-05 | 0.002683 |
| hsa-miR-4632-5p | 1063.455 | 328.305 | 0.0564579  | 0.1799078  | -1.706269151 | 9.200258133 | 0.001422 | 0.007147 |
| hsa-miR-3676-5p | 1844.57  | 573.89  | 0.13997461 | 0.16441536 | -1.687153286 | 9.998390697 | 0.002194 | 0.008889 |
| hsa-miR-17-5p   | 480.75   | 150.105 | 0.02132719 | 0.05553972 | -1.680264168 | 8.068846893 | 5.65E-05 | 0.003044 |
| hsa-miR-34a-5p  | 526.875  | 167.075 | 0.15064814 | 0.07114449 | -1.650560493 | 8.207804433 | 0.001084 | 0.005863 |
| hsa-miR-20a-5p  | 459.5    | 146.795 | 0.07848193 | 0.04619472 | -1.644807137 | 8.019292516 | 0.000188 | 0.003461 |
| hsa-miR-99b-5p  | 453.675  | 144.135 | 0.1911647  | 0.03164283 | -1.641297333 | 7.991564339 | 0.001739 | 0.007932 |
| hsa-miR-138-5p  | 441.6    | 143.525 | 0.03714873 | 0.03473334 | -1.621375455 | 7.975410723 | 4.31E-05 | 0.003044 |
| hsa-miR-4701-5p | 542.285  | 184.56  | 0.08531676 | 0.05792942 | -1.553542613 | 8.303506033 | 0.000319 | 0.003783 |
| hsa-miR-20b-5p  | 442.95   | 150.32  | 0.20768618 | 0.05343755 | -1.544410202 | 8.003067597 | 0.00283  | 0.010102 |
| hsa-miR-195-5p  | 426.06   | 148.335 | 0.07946363 | 0.06039736 | -1.521233384 | 7.972015045 | 0.00031  | 0.003783 |
| hsa-miR-24-3p   | 466.38   | 162.945 | 0.1898839  | 0.17926651 | -1.515682691 | 8.094397702 | 0.005323 | 0.014718 |
| hsa-miR-541-3p  | 438.245  | 153.62  | 0.20896393 | 0.04253135 | -1.497100677 | 8.011119859 | 0.003058 | 0.01041  |
| hsa-miR-4521    | 311.56   | 110.5   | 0.27942928 | 0.22397047 | -1.485060678 | 7.512109745 | 0.014218 | 0.029138 |
| hsa-miR-19a-3p  | 352.875  | 129.25  | 0.16080856 | 0.05744388 | -1.440796452 | 7.733227562 | 0.001766 | 0.008012 |
| hsa-miR-26b-5p  | 265      | 100.415 | 0.04802989 | 0.02232265 | -1.399364803 | 7.34933364  | 7.49E-05 | 0.003044 |
| hsa-miR-106a-5p | 476      | 181.355 | 0.09507318 | 0.05829035 | -1.390104092 | 8.19649823  | 0.000563 | 0.004486 |
| hsa-miR-4695-5p | 1236.655 | 472.475 | 0.11968133 | 0.01339458 | -1.383013147 | 9.575536044 | 0.000716 | 0.004936 |
| hsa-miR-15b-5p  | 356.93   | 136.8   | 0.06707936 | 0.05375666 | -1.382991225 | 7.786377012 | 0.000274 | 0.003666 |
| hsa-miR-3607-5p | 387.44   | 151.665 | 0.03080725 | 0.02177291 | -1.352913327 | 7.921030043 | 3.98E-05 | 0.003044 |
| hsa-miR-30d-5p  | 246      | 97.5    | 0          | 0.02175713 | -1.335354945 | 7.274837033 | 1.79E-05 | 0.002683 |
| hsa-miR-3676-3p | 350.825  | 141.135 | 0.10813448 | 0.06147448 | -1.31081031  | 7.794972835 | 0.000925 | 0.005292 |
| hsa-miR-4633-5p | 392      | 155.825 | 0.25975351 | 0.03017654 | -1.306500155 | 7.936704467 | 0.008395 | 0.019816 |

|                  |          |         |            |            |              |             |          |          |
|------------------|----------|---------|------------|------------|--------------|-------------|----------|----------|
| hsa-miR-193b-3p  | 210.335  | 84.75   | 0.21962719 | 0.02920205 | -1.294100567 | 7.051884113 | 0.005295 | 0.014718 |
| hsa-miR-30a-5p   | 231.875  | 94.5    | 0.1471392  | 0.00748261 | -1.287130103 | 7.205787282 | 0.001611 | 0.007584 |
| hsa-miR-3651     | 377.875  | 152.465 | 0.328876   | 0.07916776 | -1.271590325 | 7.885865362 | 0.01906  | 0.035323 |
| hsa-miR-766-3p   | 779.795  | 328.815 | 0.12369461 | 0.01731128 | -1.240387232 | 8.981217825 | 0.001111 | 0.005929 |
| hsa-miR-181b-5p  | 228.645  | 97.5    | 0.07821177 | 0.0652714  | -1.228963832 | 7.220273993 | 0.000634 | 0.004679 |
| hsa-miR-34b-5p   | 283.5    | 122.5   | 0.04240146 | 0.20203051 | -1.224791916 | 7.534160225 | 0.005054 | 0.014239 |
| hsa-miR-130a-3p  | 215.25   | 92.25   | 0.01478272 | 0.0268279  | -1.222573236 | 7.138503987 | 3.75E-05 | 0.003044 |
| hsa-miR-197-3p   | 553.395  | 238.735 | 0.12932223 | 0.08136312 | -1.209233768 | 8.501491559 | 0.002156 | 0.00883  |
| hsa-let-7i-5p    | 304.44   | 133.985 | 0.03047313 | 0.13177935 | -1.190042164 | 7.654658029 | 0.001589 | 0.007523 |
| hsa-miR-30e-5p   | 207.5    | 90.52   | 0.20787235 | 0.04327631 | -1.181722778 | 7.090350268 | 0.006102 | 0.015818 |
| hsa-miR-145-5p   | 212      | 93.5    | 0.10006228 | 0.00756264 | -1.177426322 | 7.135586992 | 0.000694 | 0.004916 |
| hsa-miR-4776-5p  | 624      | 277.52  | 0.0067991  | 0.06889654 | -1.170651667 | 8.700059712 | 0.000255 | 0.003666 |
| hsa-miR-1294     | 326.525  | 145.205 | 0.20561914 | 0.03121486 | -1.154041341 | 7.758616478 | 0.006162 | 0.015927 |
| hsa-miR-4649-5p  | 1037.335 | 480.495 | 0.02680957 | 0.04563498 | -1.110780785 | 9.463016488 | 0.000153 | 0.003278 |
| hsa-miR-30b-5p   | 200.125  | 91.855  | 0.18991625 | 0.02855986 | -1.110637914 | 7.076311057 | 0.005465 | 0.014876 |
| hsa-miR-3665     | 1418.655 | 671.91  | 0.09105902 | 0.11955073 | -1.080360439 | 9.927131019 | 0.002884 | 0.01016  |
| hsa-miR-4723-5p  | 1884.13  | 908.69  | 0.00515657 | 0.26276928 | -1.077372548 | 10.34098693 | 0.014816 | 0.029688 |
| hsa-miR-4763-5p  | 537.165  | 253.84  | 0.13646786 | 0.06217548 | -1.076093049 | 8.524426503 | 0.002906 | 0.010166 |
| hsa-miR-668      | 352.5    | 164.455 | 0.27080685 | 0.07270789 | -1.074891955 | 7.897085836 | 0.017842 | 0.033564 |
| hsa-miR-4323     | 536.25   | 255.54  | 0.11801596 | 0.05235368 | -1.065304906 | 8.529068527 | 0.001939 | 0.008303 |
| hsa-miR-10b-5p   | 193      | 93.085  | 0.05862025 | 0.01648409 | -1.050837786 | 7.065797683 | 0.000256 | 0.003666 |
| hsa-miR-106b-5p  | 190.5    | 92      | 0.02598293 | 0.03074377 | -1.050182677 | 7.048312313 | 9.92E-05 | 0.003044 |
| hsa-miR-6511b-5p | 610.605  | 296.175 | 0.06625163 | 0.01539913 | -1.04229023  | 8.73136564  | 0.000348 | 0.003783 |

|                                  |         |         |            |            |              |             |          |          |
|----------------------------------|---------|---------|------------|------------|--------------|-------------|----------|----------|
| hsa-miR-933                      | 537.9   | 262.5   | 0.11804832 | 0.0134687  | -1.030042271 | 8.551129317 | 0.001693 | 0.00776  |
| hsa-miR-181c-5p                  | 184.625 | 90.5    | 0.00287247 | 0.03906667 | -1.02915592  | 7.013873175 | 1.00E-04 | 0.003044 |
| hsa-miR-3607-3p                  | 218.865 | 108     | 0.02671863 | 0.11785113 | -1.023779257 | 7.261750299 | 0.00181  | 0.008125 |
| hsa-miR-129-1-3p                 | 181.835 | 90      | 0.13350002 | 0.03142697 | -1.00853249  | 6.995763033 | 0.00273  | 0.010076 |
| hsa-miR-423-3p                   | 193.3   | 96.5    | 0.08559906 | 0.00732753 | -0.999612575 | 7.092243959 | 0.000742 | 0.004936 |
| hsa-miR-634                      | 311.5   | 157.835 | 0.0385901  | 0.0586437  | -0.981519145 | 7.791791467 | 0.000455 | 0.004181 |
| hsa-miR-1234-5p                  | 1336.69 | 680.47  | 0.13363556 | 0.1259859  | -0.973339061 | 9.891309666 | 0.007024 | 0.017364 |
| hsa-miR-4664-5p                  | 193.335 | 98.335  | 0.11458689 | 0.00956376 | -0.970607605 | 7.104903908 | 0.001845 | 0.008136 |
| hsa-miR-129-2-3p                 | 176.5   | 90      | 0.13220693 | 0          | -0.96533947  | 6.974522831 | 0.002803 | 0.010102 |
| hsa-miR-1248                     | 263.125 | 135.235 | 0.01679589 | 0.07356818 | -0.962132704 | 7.558436412 | 0.000586 | 0.004486 |
| hsa-miR-4313                     | 175     | 89.625  | 0.23435539 | 0.03747567 | -0.945802359 | 6.958223771 | 0.015984 | 0.031146 |
| hsa-miR-191-5p                   | 188.5   | 98      | 0.03376107 | 0.01443075 | -0.943374766 | 7.086322114 | 0.000115 | 0.003044 |
| hsa-miR-4695-3p                  | 279.57  | 144.41  | 0.18934082 | 0.02360124 | -0.940192413 | 7.643922115 | 0.00874  | 0.020245 |
| hsa-miR-151a-5p,<br>hsa-miR-151b | 188.5   | 98.665  | 0.02625861 | 0.00480172 | -0.933713802 | 7.09131508  | 7.01E-05 | 0.003044 |
| hsa-miR-30c-5p                   | 171     | 89      | 0.17367535 | 0.01589004 | -0.931248238 | 6.941266477 | 0.006941 | 0.017223 |
| hsa-miR-21-3p                    | 158     | 83      | 0.05370431 | 0.01703872 | -0.927805045 | 6.838837236 | 0.00031  | 0.003783 |
| hsa-miR-1229-3p                  | 377     | 197.51  | 0.19131271 | 0.05527684 | -0.920418573 | 8.084888284 | 0.01048  | 0.023194 |
| hsa-miR-455-3p                   | 159.5   | 84.25   | 0.05763253 | 0.01258944 | -0.919666023 | 6.856380626 | 0.000356 | 0.003783 |
| hsa-miR-93-5p                    | 244.57  | 129.8   | 0.003296   | 0.05665571 | -0.915111792 | 7.476543823 | 0.000329 | 0.003783 |
| hsa-miR-107                      | 197.5   | 105     | 0.02506201 | 0.0808122  | -0.913596023 | 7.168684255 | 0.000937 | 0.005292 |
| hsa-miR-449b-3p                  | 215.5   | 115.58  | 0.07546847 | 0.18329226 | -0.908959091 | 7.295007369 | 0.010702 | 0.023538 |
| hsa-miR-28-5p                    | 173     | 92.415  | 0.02452393 | 0.0369564  | -0.904848914 | 6.98198682  | 0.000193 | 0.003461 |

|                                       |         |         |            |            |              |             |          |          |
|---------------------------------------|---------|---------|------------|------------|--------------|-------------|----------|----------|
| hsa-miR-25-3p                         | 176.665 | 95.215  | 0.05071204 | 0.02651233 | -0.89108089  | 7.018403848 | 0.000364 | 0.003783 |
| hsa-miR-3622a-3p                      | 351.235 | 193.235 | 0.0009462  | 0.03626376 | -0.862554327 | 8.025015318 | 0.000149 | 0.003278 |
| hsa-miR-3620-3p                       | 339.315 | 188.035 | 0.13622613 | 0.00725778 | -0.844918513 | 7.977297671 | 0.004568 | 0.013351 |
| hsa-miR-3176                          | 325.235 | 183.375 | 0.11407718 | 0.04916489 | -0.822848895 | 7.92920526  | 0.003776 | 0.012136 |
| hsa-miR-1976                          | 338     | 191.07  | 0.02928845 | 0.0153212  | -0.822697181 | 7.989221389 | 0.000145 | 0.003278 |
| hsa-miR-1538                          | 164     | 93      | 0          | 0          | -0.818393194 | 6.948355408 | 4.09E-05 | 0.003044 |
| hsa-miR-4655-5p                       | 1097.24 | 632.425 | 0.00159821 | 0.04153697 | -0.795534442 | 9.701895264 | 0.00025  | 0.003666 |
| hsa-miR-103a-3p                       | 165     | 96.165  | 0.11142289 | 0.03183874 | -0.774756177 | 6.974452383 | 0.003716 | 0.011986 |
| hsa-miR-718                           | 248.5   | 144.42  | 0.20203051 | 0.05023484 | -0.769012381 | 7.557722179 | 0.019727 | 0.03625  |
| hsa-miR-4534                          | 451.5   | 264.5   | 0.13938539 | 0.00267337 | -0.764419313 | 8.429330991 | 0.006532 | 0.016393 |
| hsa-miR-6511a-5p,<br>hsa-miR-6511b-5p | 538.7   | 318.1   | 0.10422179 | 0.05890704 | -0.757325951 | 8.690746898 | 0.004352 | 0.012983 |
| hsa-miR-9-3p                          | 141.5   | 84      | 0.00499722 | 0.01683588 | -0.752434052 | 6.76843221  | 8.59E-05 | 0.003044 |
| hsa-miR-1234-3p                       | 173.335 | 103.55  | 0.04621986 | 0.04028904 | -0.743050216 | 7.065123166 | 0.000755 | 0.004951 |
| hsa-miR-4780                          | 152.5   | 93      | 0.06955149 | 0          | -0.711759781 | 6.895038702 | 0.00119  | 0.006242 |
| hsa-miR-181d                          | 143.5   | 88.875  | 0.05420331 | 0.02585763 | -0.690381932 | 6.818655523 | 0.000898 | 0.005287 |
| hsa-miR-1193                          | 290.4   | 180.05  | 0.11979908 | 0.04885536 | -0.685310254 | 7.834047529 | 0.007275 | 0.017749 |
| hsa-miR-4687-5p                       | 438.855 | 270.43  | 0.20670775 | 0.06421825 | -0.684400183 | 8.419822538 | 0.030038 | 0.049739 |
| hsa-miR-6511a-3p                      | 260     | 163.22  | 0.04351426 | 0.1023273  | -0.674797011 | 7.684286051 | 0.004989 | 0.014199 |
| hsa-miR-3621                          | 994.605 | 624.84  | 0.00086024 | 0.02704669 | -0.670900494 | 9.62252936  | 0.000199 | 0.003461 |
| hsa-miR-130b-3p                       | 146.75  | 92.5    | 0.01204611 | 0.0076444  | -0.665803971 | 6.864262369 | 0.000108 | 0.003044 |
| hsa-miR-6131                          | 328     | 207.575 | 0.00431163 | 0.05174492 | -0.661022776 | 8.027033912 | 0.000723 | 0.004936 |
| hsa-miR-4258                          | 255.145 | 161.615 | 0.12668032 | 0.02157001 | -0.653112689 | 7.662805811 | 0.008227 | 0.019578 |

|                   |          |         |            |            |              |             |          |          |
|-------------------|----------|---------|------------|------------|--------------|-------------|----------|----------|
| hsa-miR-5739      | 932.965  | 592.345 | 0.10908649 | 0.0435835  | -0.651765914 | 9.535491405 | 0.006439 | 0.01621  |
| hsa-miR-4728-3p   | 294.1    | 187.44  | 0.03317944 | 0.07876862 | -0.651722036 | 7.87390479  | 0.002685 | 0.009996 |
| hsa-miR-374a-5p   | 139.5    | 88.25   | 0.1774103  | 0.0280439  | -0.649438381 | 6.787959853 | 0.021037 | 0.038015 |
| hsa-miR-361-5p    | 142      | 91      | 0.02987775 | 0.01554081 | -0.641717555 | 6.828566304 | 0.000324 | 0.003783 |
| hsa-miR-5010-5p   | 555.41   | 356.39  | 0.08298234 | 0.0077776  | -0.637630204 | 8.796106331 | 0.002682 | 0.009996 |
| hsa-miR-143-3p    | 127.5    | 82      | 0.0942809  | 0          | -0.633588298 | 6.674346153 | 0.00382  | 0.012187 |
| hsa-miR-4253      | 141.835  | 91.5    | 0.01161602 | 0.02318383 | -0.632515152 | 6.83176353  | 0.000224 | 0.003621 |
| hsa-miR-4713-5p   | 288.945  | 186.8   | 0.06879085 | 0.07419322 | -0.629579768 | 7.858152415 | 0.004714 | 0.013641 |
| hsa-miR-1290      | 1293.425 | 839.905 | 0.06169434 | 0.07729383 | -0.623682249 | 10.02376546 | 0.004554 | 0.013351 |
| hsa-miR-4758-3p   | 282.4    | 183.675 | 0.08313012 | 0.05139445 | -0.619041329 | 7.82957882  | 0.004509 | 0.01329  |
| hsa-miR-3180-5p   | 150.5    | 98      | 0.07047576 | 0.01443075 | -0.617191311 | 6.923230387 | 0.002003 | 0.008428 |
| hsa-miR-4723-3p   | 236.5    | 154.66  | 0.08072678 | 0.04882905 | -0.611246243 | 7.577718971 | 0.004253 | 0.012817 |
| hsa-miR-4446-3p   | 243.375  | 161.37  | 0.07772001 | 0.0872874  | -0.593379927 | 7.628165295 | 0.00834  | 0.01974  |
| hsa-miR-424-5p    | 146.25   | 97.125  | 0.0652714  | 0.06006312 | -0.590286123 | 6.895611516 | 0.00399  | 0.012547 |
| hsa-miR-125b-1-3p | 136      | 90      | 0.14558081 | 0.03142697 | -0.588281227 | 6.785637401 | 0.016646 | 0.031864 |
| hsa-miR-320d      | 214      | 145.365 | 0          | 0.06143679 | -0.55929349  | 7.461820242 | 0.001806 | 0.008125 |

\*CV: coefficient of variance, \*\*AveExpr: Average expression level, \*\*\*adj. *p* value: adjust *p*-values
